# Supplementary material for: Extreme Viral Partitioning in a Marine-Derived High Arctic Lake
Source: PubMed Central journal article supplement (PMC7227771; doi:10.1128/msphere.00334-20), 2020-05-13
Supplement: mSphere.00334-20-sf003.pdf [file mSphere.00334-20-sf003.pdf]

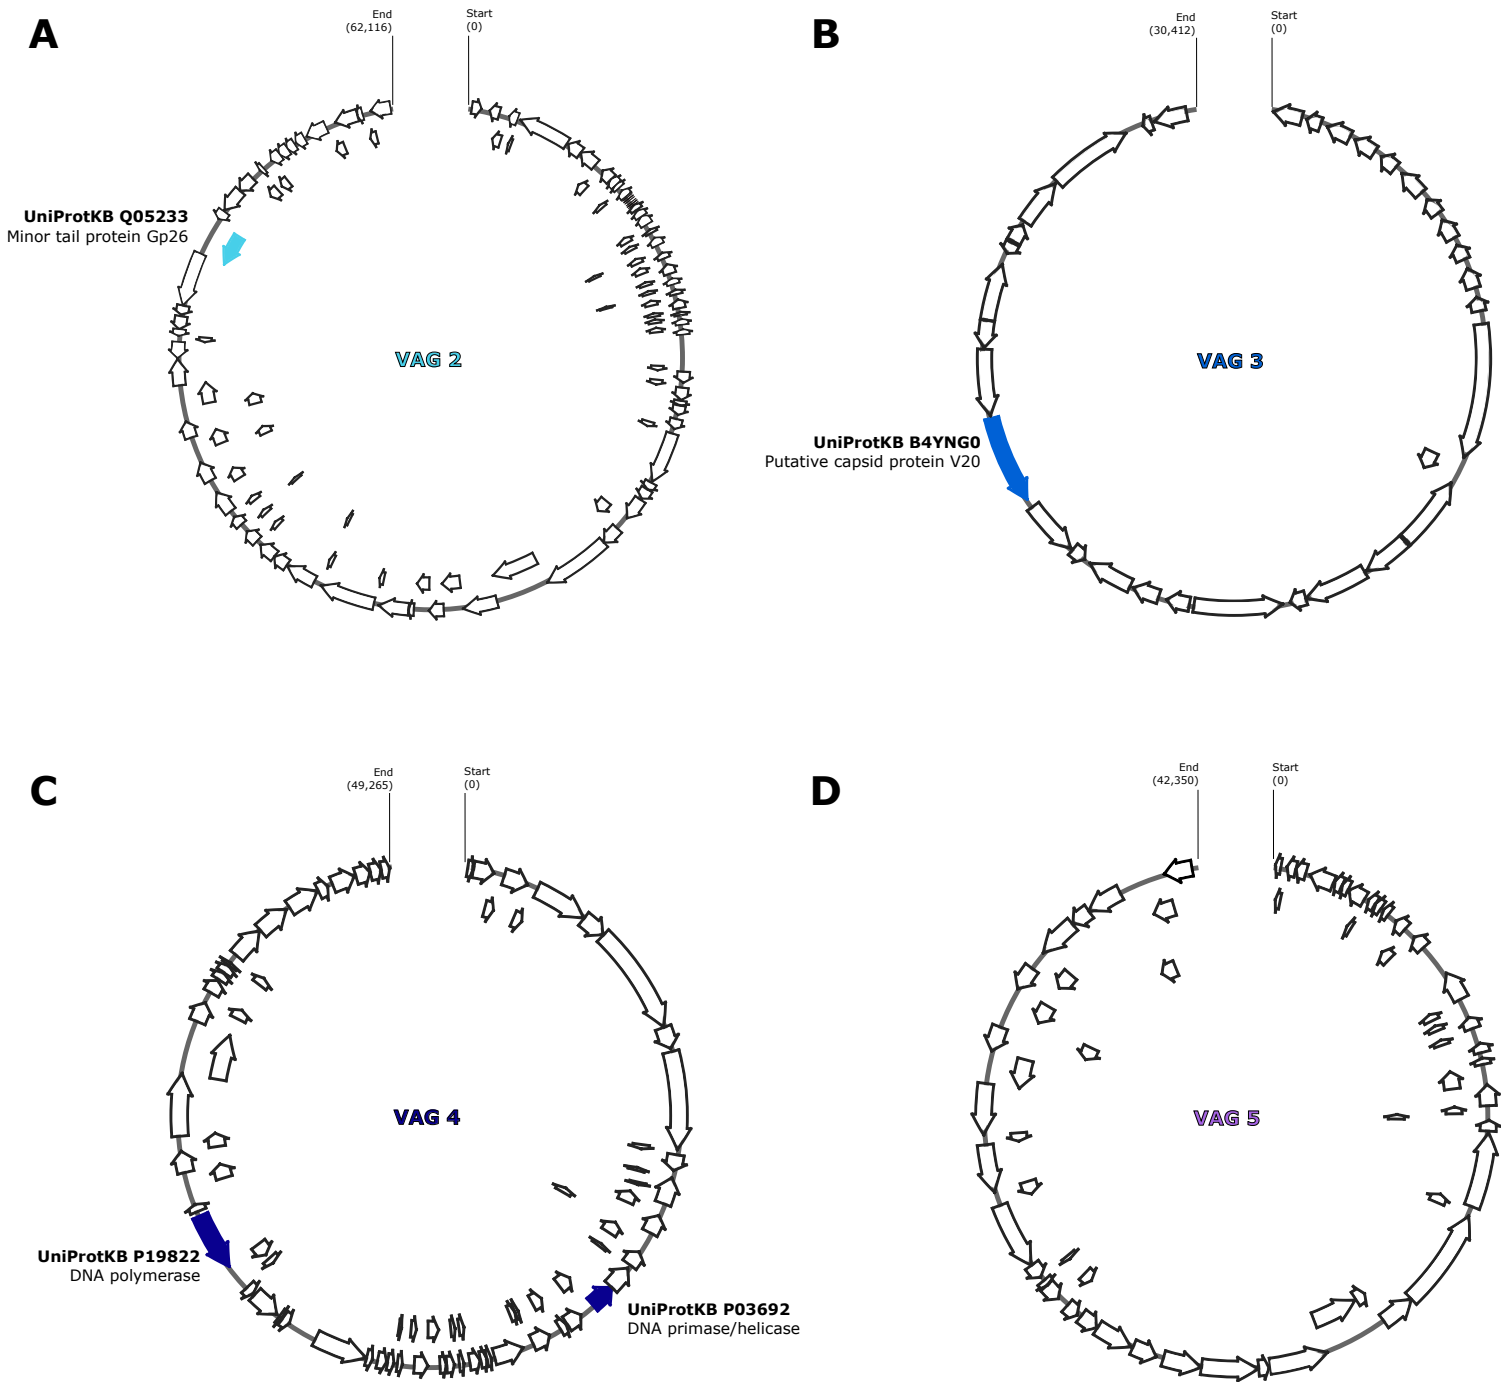

FIGURE S3
