# Supplementary material for: Extreme Viral Partitioning in a Marine-Derived High Arctic Lake
Source: PubMed Central journal article supplement (PMC7227771; doi:10.1128/msphere.00334-20), 2020-05-13
Supplement: mSphere.00334-20-st001.pdf [file mSphere.00334-20-st001.pdf]

**TABLE S1.** Modules with significant correlations to environmental variables based on WGCNA.

| Module | Size (vOTUs) | Water-column layer | Environmental variable                                 |
|--------|--------------|--------------------|--------------------------------------------------------|
| B      | 220          | Mixolimnion        | Oxygen                                                 |
| C      | 287          | Mixolimnion        | Oxygen                                                 |
| I      | 49           | Metalimnion        | N/A                                                    |
| J      | 290          | Metalimnion        | N/A                                                    |
| O      | 1538         | Monimolimnion      | Total nitrogen                                         |
| P      | 61           | N/A                | Total nitrogen                                         |
| T      | 1176         | N/A                | High bacteriochlorophylls <i>e</i> -like concentration |
| U      | 710          | Monimolimnion      | N/A                                                    |
| V      | 130          | N/A                | High bacteriochlorophylls <i>e</i> -like concentration |

N/A: no significant correlation was observed
