# Supplementary material for: Extreme Viral Partitioning in a Marine-Derived High Arctic Lake
Source: PubMed Central journal article supplement (PMC7227771; doi:10.1128/msphere.00334-20), 2020-05-13
Supplement: mSphere.00334-20-st002.pdf [file mSphere.00334-20-st002.pdf]

**TABLE S2.** Sequence processing details.

| Sample           | Sequencing  | Quality check <sup>a</sup> |               | Assembly     |          | Viral contig identification |          | Size filtering <sup>b</sup> | vOTU mapping                               |
|------------------|-------------|----------------------------|---------------|--------------|----------|-----------------------------|----------|-----------------------------|--------------------------------------------|
|                  | Read count  | Read count                 | Accession no. | Contig count | N50 (bp) | Contig count                | N50 (bp) | Contig count                | Percentage of recruited reads <sup>c</sup> |
| 5m triplicate    | 19,384,960  | 19,319,104                 |               | 566,849      | 761      | 8121                        | 11,147   | 6745                        | 57.70                                      |
| AI05             | 2,211,670   | 2,182,401                  | SAMN11892756  | 72,169       | 395      | 569                         | 8984     | 430                         | 60.81                                      |
| AII05            | 9,298,996   | 9,295,973                  | SAMN11892757  | 249,889      | 1045     | 4055                        | 12,785   | 3402                        | 58.28                                      |
| AIII05           | 7,874,294   | 7,840,730                  | SAMN11892758  | 244,791      | 843      | 3497                        | 11,672   | 2913                        | 54.02                                      |
| 15m triplicate   | 19,894,901  | 19,768,736                 |               | 991,655      | 442.7    | 4421                        | 10,674   | 3911                        | 44.80                                      |
| AI15             | 1,822,241   | 1,732,047                  | SAMN11892759  | 90,978       | 297      | 365                         | 10,675   | 312                         | 56.79                                      |
| AII15            | 11,520,785  | 11,513,604                 | SAMN11892760  | 520,896      | 551      | 2381                        | 10,821   | 2154                        | 39.64                                      |
| AIII15           | 6,551,875   | 6,523,085                  | SAMN11892761  | 379,781      | 480      | 1675                        | 10,526   | 1445                        | 37.97                                      |
| 20m triplicate   | 32,434,003  | 32,178,670                 |               | 1,387,312    | 393.3    | 6728                        | 11,355.3 | 6179                        | 55.88                                      |
| AI20             | 13,076,691  | 13,050,214                 | SAMN11892762  | 534,157      | 412      | 2747                        | 11,622   | 2516                        | 55.36                                      |
| AII20            | 10,267,801  | 10,071,064                 | SAMN11892763  | 441,955      | 377      | 1872                        | 10,986   | 1729                        | 54.96                                      |
| AIII20           | 9,089,511   | 9,057,392                  | SAMN11892764  | 411,200      | 391      | 2109                        | 11,458   | 1934                        | 57.32                                      |
| 28m triplicate   | 27,862,532  | 27,365,617                 |               | 1,387,385    | 387      | 5860                        | 12,830.7 | 5458                        | 44.77                                      |
| AI28             | 9,809,644   | 9,642,476                  | SAMN11892765  | 471,816      | 378      | 1938                        | 12,903   | 1796                        | 46.62                                      |
| AII28            | 9,624,201   | 9,534,513                  | SAMN11892766  | 440,435      | 407      | 2122                        | 13,091   | 1984                        | 46.20                                      |
| AIII28           | 8,428,687   | 8,188,628                  | SAMN11892767  | 475,134      | 376      | 1800                        | 12,498   | 1678                        | 41.49                                      |
| 40m triplicate   | 26,327,065  | 26,075,334                 |               | 2,475,415    | 379.7    | 8135                        | 9167.7   | 7311                        | 22.40                                      |
| AI40             | 7,759,734   | 7,705,466                  | SAMN11892768  | 753,317      | 395      | 2586                        | 8889     | 2323                        | 24.10                                      |
| AII40            | 10,783,327  | 10,685,294                 | SAMN11892769  | 955,348      | 389      | 3622                        | 8895     | 3259                        | 22.50                                      |
| AIII40           | 7,784,004   | 7,684,574                  | SAMN11892770  | 766,750      | 355      | 1927                        | 9719     | 1729                        | 20.59                                      |
| All <sup>d</sup> | 125,903,461 | 124,707,461                | PRJNA545459   | 6,808,616    | 472.7    | 33,265                      | 11,034.9 | 29,604                      | 45.11                                      |

<sup>a</sup> Quality check involves trimming for adapters and low-quality bases, removal of unpaired reads, and error-correction.

<sup>b</sup> Filtered to remove contigs smaller than 2000bp

<sup>c</sup> Percentage of quality filtered reads from each sample that have been recruited by the vOTU assemblage (which merges viral contigs from all samples into a single assemblage)

<sup>d</sup> Counts are given as sums, N50 and percentage are given as mean. Accession number is for SRA BioProject.
