# Supplementary material for: Extreme Viral Partitioning in a Marine-Derived High Arctic Lake
Source: PubMed Central journal article supplement (PMC7227771; doi:10.1128/msphere.00334-20), 2020-05-13
Supplement: mSphere.00334-20-st003.pdf [file mSphere.00334-20-st003.pdf]

**TABLE S3.** UniProtKB-Prokka annotation and metadata for 10 circular viral assembled genomes (VAGs).

NOTE: Data for only non-hypothetical proteins presented here; bold indicates VAGs that were presented in Figure 5 of the main text

| VAG# | vOTU ID                                     | WGCA module                               | Water-column distribution                                 | Genome size (bp) | Total ORFs | Contig hit                                                                                                          | EC number                                             | UniProtKB code                                                     | UniProtKB gene ID                                                                                                                                                               | UniProtKB viral ID                                                                                                                                                                                                                                                                                                                                                                  | UniProtKB viral lineage                                                                                                                                                                                                                                                                                                                                                                                                                                                                                                                                                                                                                                                                                                                                                           |
|------|---------------------------------------------|-------------------------------------------|-----------------------------------------------------------|------------------|------------|---------------------------------------------------------------------------------------------------------------------|-------------------------------------------------------|--------------------------------------------------------------------|---------------------------------------------------------------------------------------------------------------------------------------------------------------------------------|-------------------------------------------------------------------------------------------------------------------------------------------------------------------------------------------------------------------------------------------------------------------------------------------------------------------------------------------------------------------------------------|-----------------------------------------------------------------------------------------------------------------------------------------------------------------------------------------------------------------------------------------------------------------------------------------------------------------------------------------------------------------------------------------------------------------------------------------------------------------------------------------------------------------------------------------------------------------------------------------------------------------------------------------------------------------------------------------------------------------------------------------------------------------------------------|
| 6    | VIRSorter_NODE_47_length_54735_cov_16_1727  | none                                      | abundant at 5m, present at 15m                            | 54,735           | 91         | KNFAEGHP_00023<br>KNFAEGHP_00051<br>KNFAEGHP_00082                                                                  | NA<br>2.7.7.-<br>NA                                   | Q05235<br>P21442<br>Q9Z29                                          | Minor tail protein Gp28<br>Integrase<br>Probable transcriptional regulator Whi8TM4                                                                                              | <i>Mycobacterium phage L5 (Mycobacteriophage L5)</i><br><i>Haemophilus phage HP1 (strain HP1c1) (Bacteriophage HP1)</i><br><i>Mycobacterium phage TM4 (Mycobacteriophage TM4)</i>                                                                                                                                                                                                   | Viruses > Caudovirales > Siphoviridae > Fromanvirus<br>Viruses > Caudovirales > Myoviridae > Peduovirinae > Hpunavirus > Haemophilus phage HP1<br>Viruses > Caudovirales > Siphoviridae > Timquatrovirus > Mycobacterium virus TM4                                                                                                                                                                                                                                                                                                                                                                                                                                                                                                                                                |
| 7    | VIRSorter_NODE_11_length_101329_cov_28_0366 | none                                      | only present at 5m, largest genome (>100kb), 150-160 ORFs | 101,329          | 159        | GCLMJFHJ_00029<br>GCLMJFHJ_00058<br>GCLMJFHJ_00059                                                                  | NA<br>1.17.4.1<br>1.17.4.1                            | P25480<br>O64174<br>Q76RD8                                         | Probable portal protein<br>Ribonucleoside-diphosphate reductase subunit beta<br>Ribonucleoside-diphosphate reductase large subunit                                              | <i>Escherichia phage P2 (Bacteriophage P2)</i><br><i>Bacillus phage SPbeta (Bacillus phage SPbc2) (Bacteriophage SP-beta)</i><br><i>Vaccinia virus (strain Ankara) (VACV)</i>                                                                                                                                                                                                       | Viruses > Caudovirales > Myoviridae > Peduovirinae > Peduovirus<br>Viruses > Caudovirales > Siphoviridae > Spbetavirus<br>Viruses > Poxviridae > Chordopoxvirinae > Orthopoxvirus > Vaccinia virus                                                                                                                                                                                                                                                                                                                                                                                                                                                                                                                                                                                |
| 5    | VIRSorter_NODE_30_length_42405_cov_14_8062  | J (metalimnion)                           | present everywhere but 5m, very abundant at 15m           | 42,350           | 63         | none                                                                                                                |                                                       |                                                                    |                                                                                                                                                                                 |                                                                                                                                                                                                                                                                                                                                                                                     |                                                                                                                                                                                                                                                                                                                                                                                                                                                                                                                                                                                                                                                                                                                                                                                   |
| 8    | VIRSorter_NODE_4_length_87432_cov_13_5877   | N                                         | present only in metalimnion, especially at 15m            | 87,432           | 155        | LOFIEDBH_00018<br>LOFIEDBH_00019                                                                                    | 3.4.-.<br>3.4.21.-                                    | P85500<br>Q6QGD7                                                   | Capsid polyprotein<br>Prohead protease                                                                                                                                          | <i>Pseudomonas phage PAJU2</i><br><i>Escherichia phage T5 (Enterobacteria phage T5)</i>                                                                                                                                                                                                                                                                                             | Viruses > Caudovirales > Siphoviridae > Detrevirus > unclassified Detrevirus<br>Viruses > Caudovirales > Siphoviridae > Tequintavirus                                                                                                                                                                                                                                                                                                                                                                                                                                                                                                                                                                                                                                             |
| 9    | VIRSorter_NODE_13_length_64037_cov_26_883   | T (bacterio-chlorophyll-e-likes pigments) | unique to 28m, pretty abundant                            | 64,037           | 91         | KBGDBGMK_00072<br>KBGDBGMK_00078<br>KBGDBGMK_00088<br>KBGDBGMK_00089                                                | NA<br>NA<br>2.7.7.7<br>NA                             | P68928<br>P06153<br>P19822<br>P04526                               | Terminase small subunit<br>Immunity repressor protein<br>DNA polymerase<br>Sliding-clamp-loader gp44 subunit                                                                    | <i>Bacillus phage SF6 (Bacteriophage SF6)</i><br><i>Bacillus phage phi105 (Bacteriophage phi-105)</i><br><i>Escherichia phage T5 (Enterobacteria phage T5)</i><br><i>Enterobacteria phage T4 (Bacteriophage T4)</i>                                                                                                                                                                 | Viruses > Caudovirales > Siphoviridae > unclassified Siphoviridae<br>Viruses > Caudovirales > Siphoviridae > unclassified Siphoviridae<br>Viruses > Caudovirales > Siphoviridae > Tequintavirus<br>Viruses > Caudovirales > Myoviridae > Tevenvirinae > Tequatrovirus                                                                                                                                                                                                                                                                                                                                                                                                                                                                                                             |
| 2    | VIRSorter_NODE_8_length_62171_cov_111_284   | none                                      | unique to metalimnion, especially at 15m                  | 62,116           | 106        | CGDLDOEA_00094                                                                                                      | NA                                                    | Q05233                                                             | Minor tail protein Gp26                                                                                                                                                         | <i>Mycobacterium phage L5 (Mycobacteriophage L5)</i>                                                                                                                                                                                                                                                                                                                                | Viruses > Caudovirales > Siphoviridae > Fromanvirus                                                                                                                                                                                                                                                                                                                                                                                                                                                                                                                                                                                                                                                                                                                               |
| 10   | VIRSorter_NODE_10_length_54657_cov_20_8832  | none                                      | unique to metalimnion                                     | 54,657           | 72         | NKNDGJMO_00050<br>NKNDGJMO_00065<br>NKNDGJMO_00069<br>NKNDGJMO_00071                                                | 3.2.1.17<br>2.7.7.7<br>3.1.11.1<br>3.1.22.-           | P11187<br>P19822<br>P04536<br>P03015                               | Endolysin<br>DNA polymerase<br>Exodeoxyribonuclease<br>Serine recombinase gin                                                                                                   | <i>Bacillus phage phi29 (Bacteriophage phi-29)</i><br><i>Escherichia phage T5 (Enterobacteria phage T5)</i><br><i>Enterobacteria phage T4 (Bacteriophage T4)</i><br><i>Escherichia phage Mu (Bacteriophage Mu)</i>                                                                                                                                                                  | Viruses > Caudovirales > Podoviridae > Picovirinae > Salasvirus<br>Viruses > Caudovirales > Siphoviridae > Tequintavirus<br>Viruses > Caudovirales > Myoviridae > Tevenvirinae > Tequatrovirus<br>Viruses > Caudovirales > Myoviridae > Muvirus                                                                                                                                                                                                                                                                                                                                                                                                                                                                                                                                   |
| 4    | VIRSorter_NODE_29_length_49320_cov_59_3851  | U (monimolimnion)                         | abundant at 28 and 40m                                    | 49,265           | 76         | ICIEGKNE_00023<br>ICIEGKNE_00055                                                                                    | 2.7.7.-<br>2.7.7.7                                    | P03692<br>P19822                                                   | DNA primase/helicase<br>DNA polymerase                                                                                                                                          | <i>Enterobacteria phage T7 (Bacteriophage T7)</i><br><i>Escherichia phage T5 (Enterobacteria phage T5)</i>                                                                                                                                                                                                                                                                          | Viruses > Caudovirales > Podoviridae > Autographivirinae > Teseptimavirus > Escherichia virus T7<br>Viruses > Caudovirales > Siphoviridae > Tequintavirus                                                                                                                                                                                                                                                                                                                                                                                                                                                                                                                                                                                                                         |
| 1    | VIRSorter_NODE_36_length_44859_cov_34_6262  | T (bacterio-chlorophyll-e-likes pigments) | only present at 28m                                       | 44,805           | 50         | DHLCPJL_00019<br>DHLCPJL_00021<br>DHLCPJL_00025<br>DHLCPJL_00028<br>DHLCPJL_00035<br>DHLCPJL_00036<br>DHLCPJL_00041 | 3.6.4.-<br>2.7.7.6<br>NA<br>NA<br>NA<br>NA<br>3.1.-.- | P11107<br>P00573<br>P03728<br>P19727<br>P03746<br>P03747<br>P03694 | Probable helicase D10<br>T7 RNA polymerase<br>Portal protein<br>Minor capsid protein<br>Tail tubular protein gp11<br>Tail tubular protein gp12<br>Terminase, large subunit gp19 | <i>Escherichia phage T5 (Enterobacteria phage T5)</i><br><i>Enterobacteria phage T7 (Bacteriophage T7)</i><br><i>Enterobacteria phage T7 (Bacteriophage T7)</i> | Viruses > Caudovirales > Siphoviridae > Tequintavirus<br>Viruses > Caudovirales > Podoviridae > Autographivirinae > Teseptimavirus > Escherichia virus T7<br>Viruses > Caudovirales > Podoviridae > Autographivirinae > Teseptimavirus > Escherichia virus T7<br>Viruses > Caudovirales > Podoviridae > Autographivirinae > Teseptimavirus > Escherichia virus T7<br>Viruses > Caudovirales > Podoviridae > Autographivirinae > Teseptimavirus > Escherichia virus T7<br>Viruses > Caudovirales > Podoviridae > Autographivirinae > Teseptimavirus > Escherichia virus T7<br>Viruses > Caudovirales > Podoviridae > Autographivirinae > Teseptimavirus > Escherichia virus T7<br>Viruses > Caudovirales > Podoviridae > Autographivirinae > Teseptimavirus > Escherichia virus T7 |
| 3    | VIRSorter_NODE_144_length_30467_cov_60_9971 | B (mixolimnion & oxygen)                  | very abundant at 5m, present at 15m                       | 30,412           | 33         | FIEOHON_00024                                                                                                       | NA                                                    | B4YNG0                                                             | Putative capsid protein V20                                                                                                                                                     | <i>Sputnik virophage</i>                                                                                                                                                                                                                                                                                                                                                            | Viruses > Lavidaviridae > Sputnikvirus > Mimivirus-dependent virus Sputnik                                                                                                                                                                                                                                                                                                                                                                                                                                                                                                                                                                                                                                                                                                        |
